# Supplementary material for: Still Many to Be Named: An Integrative Analysis of the Genus Dendronotus (Gastropoda: Nudibranchia) in the North Pacific Revealed Seven New Species
Source: MDPI journal article supplement (doi:10.3390/d15020162), 2023-01-23
Supplement: s1 [file s1]

Table S2. Amplification and sequencing primers and PCR conditions

| Marker                                | Primers                                                                                                     | PCR conditions                                                                   | Reference                                            |
|---------------------------------------|-------------------------------------------------------------------------------------------------------------|----------------------------------------------------------------------------------|------------------------------------------------------|
| <b>Cytochrome c oxidase subunit I</b> | <b>LCO1490</b><br>GGT CAA CAA ATC ATA AAG ATA TTG G<br><b>HCO2198</b><br>TAA ACT TCA GGG TGA CCA AAA AAT CA | 5 min - 94°C, 35×[15 s<br>- 95°C, 45 s - 45°C, 1<br>min - 72°C], 7 min -<br>72°C | Folmer et al.<br>1994                                |
| <b>16S rRNA</b>                       | <b>16Sar-L</b><br>CGC CTG TTT ATC AAA AAC AT<br><b>16S R</b><br>CCG RTY TGA ACT CAG CTC ACG                 | 5 min - 94°C, 35×[20 s<br>- 95°C, 30 s - 52°C, 45<br>s - 72°C], 7 min - 72°C     | Palumbi et al.<br>1991<br>Puslednik and<br>Serb 2008 |
| <b>Histone H3</b>                     | <b>H3AF</b><br>ATG GCT CGT ACC AAG CAG ACV GC<br><b>H3AR</b><br>ATA TCC TTR GGC ATR ATR GTG AC              | 5 min - 94°C, 35×[15 s<br>- 94°C, 30 s - 50°C, 45<br>s - 72°C], 7 min - 72°C     | Colgan et al.,<br>1998                               |
| <b>28S rRNA</b>                       | <b>28SC1</b><br>ACC CGC TGA ATT TAA GCA T<br><b>28SC2</b><br>TGA ACT CTC TCT TCA AAG TTC TTT TC             | 5 min - 94°C, 35×[15 s<br>- 94°C, 30 s - 50°C, 45<br>s - 72°C], 7 min - 72°C     | Lê et al., 1993                                      |
