# Supplementary figures and images for: Still Many to Be Named: An Integrative Analysis of the Genus Dendronotus (Gastropoda: Nudibranchia) in the North Pacific Revealed Seven New Species
Source: MDPI journal article supplement (doi:10.3390/d15020162), 2023-01-23

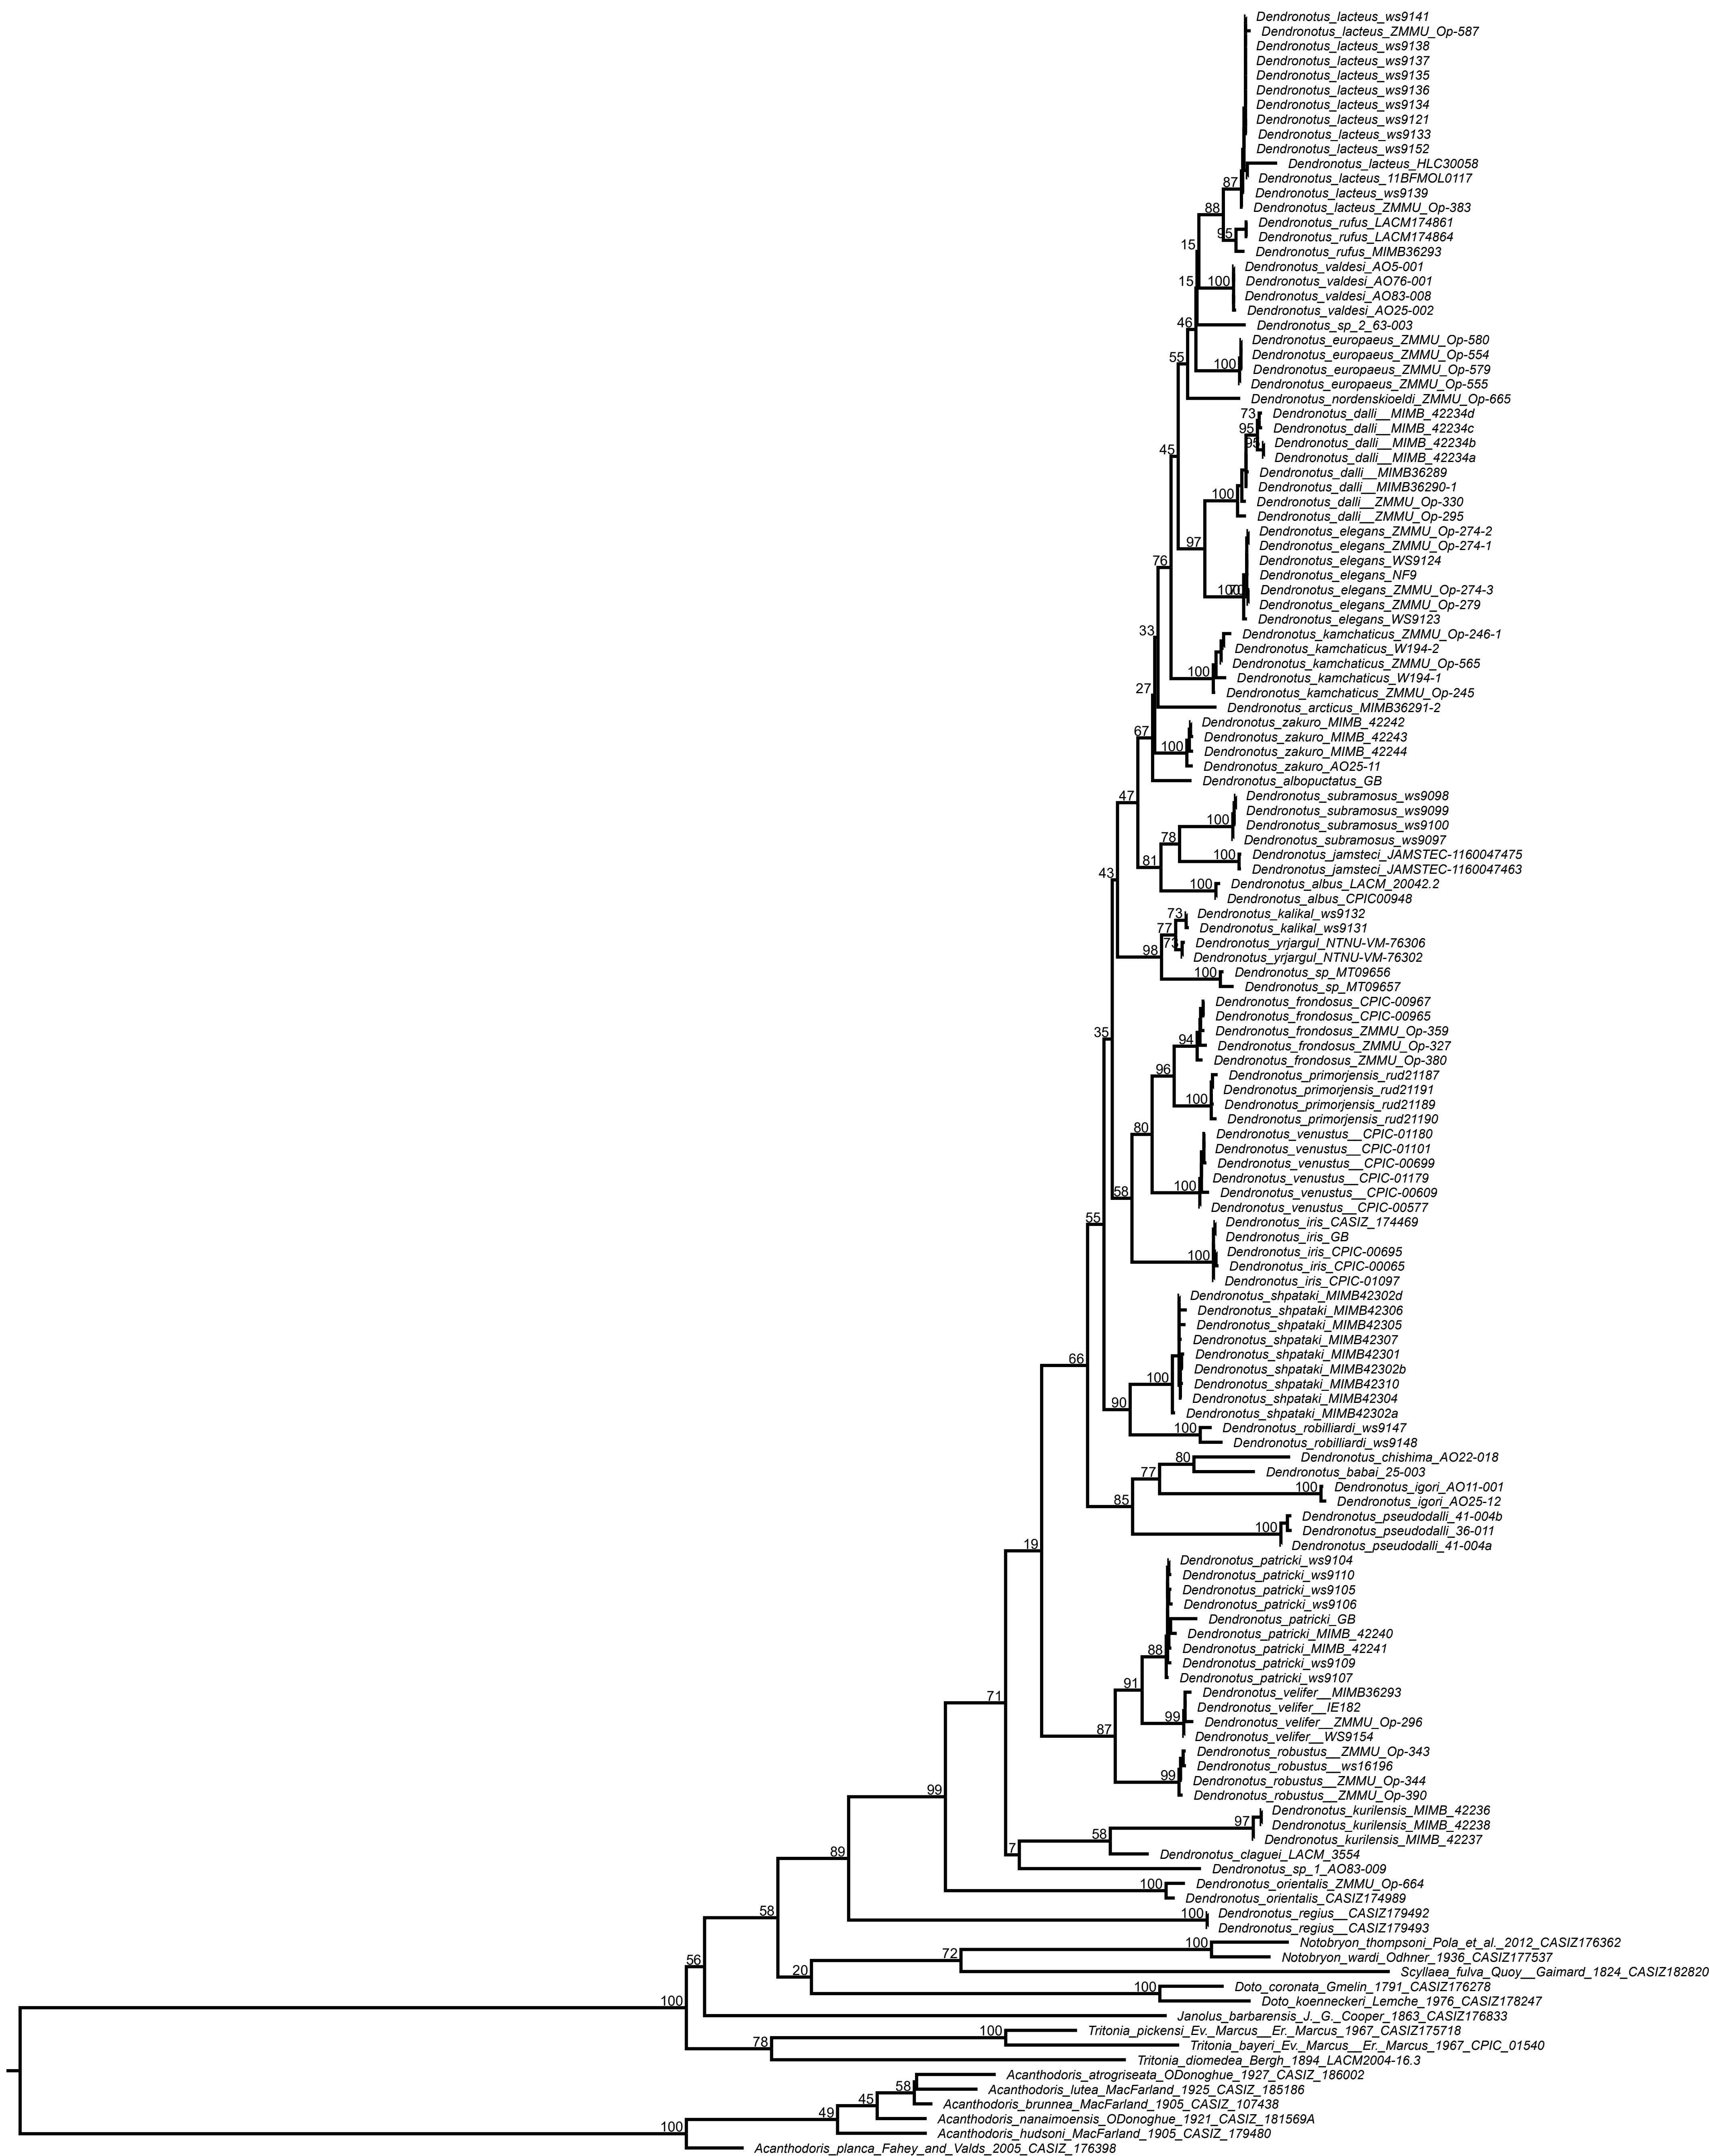

Supplement: s1 [file s1]

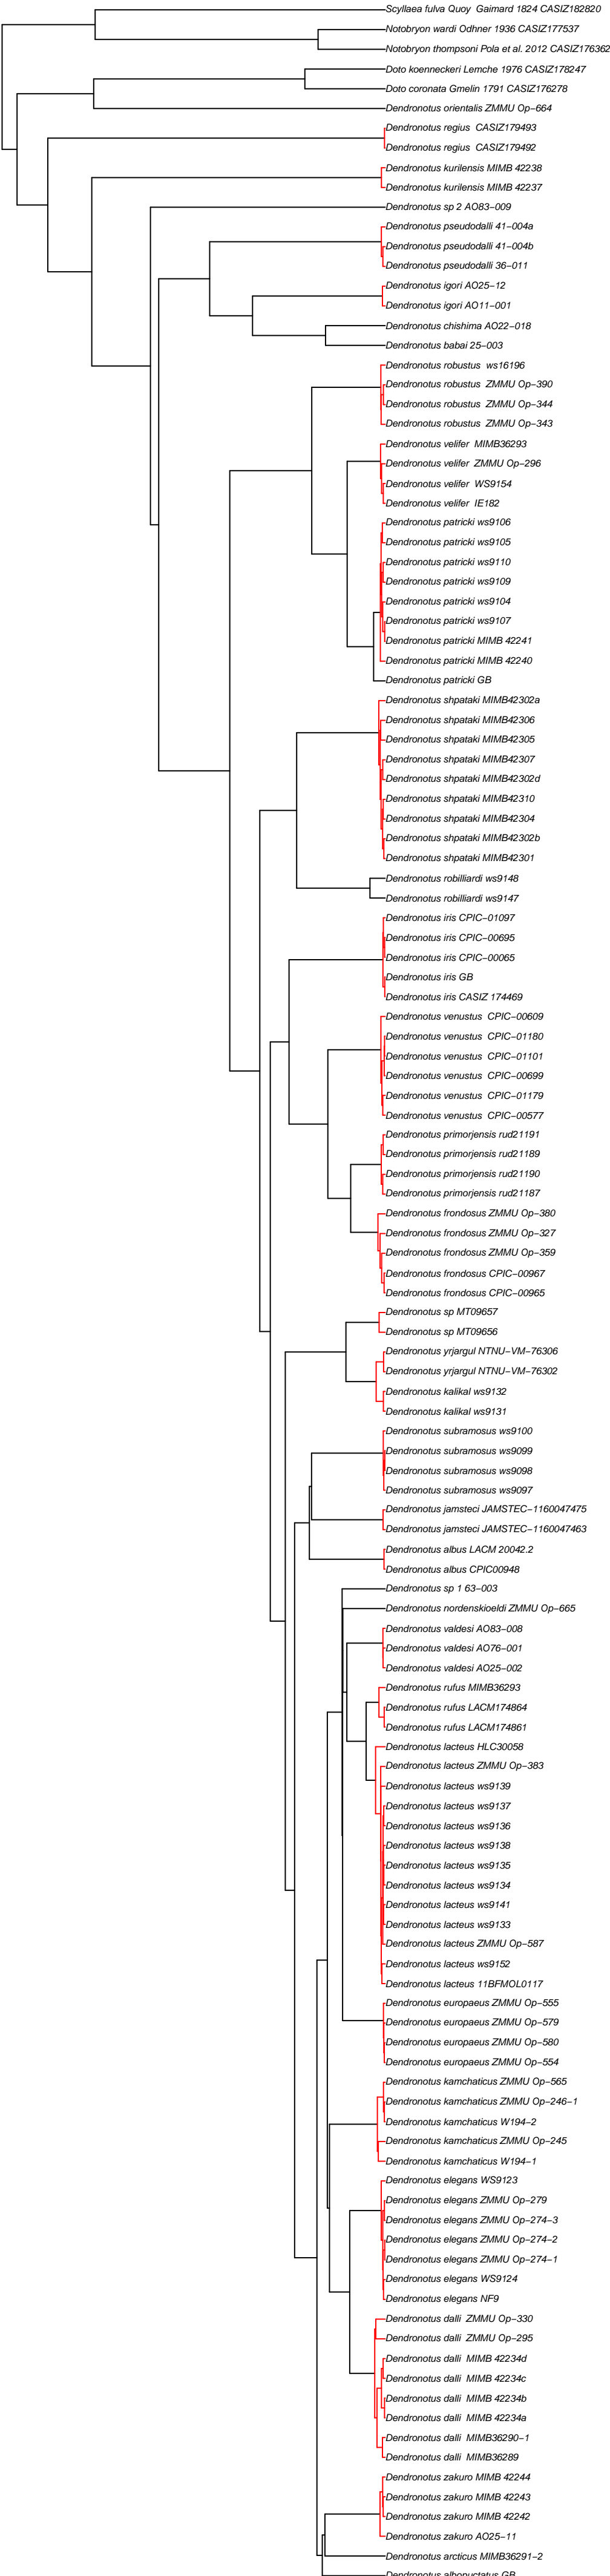

Supplement: s1 [file s1]
